# Supplementary material for: Neocortical activity is stimulus- and scale-invariant
Source: PubMed Central journal article supplement (PMC5425225; doi:10.1371/journal.pone.0177396), 2017-05-10

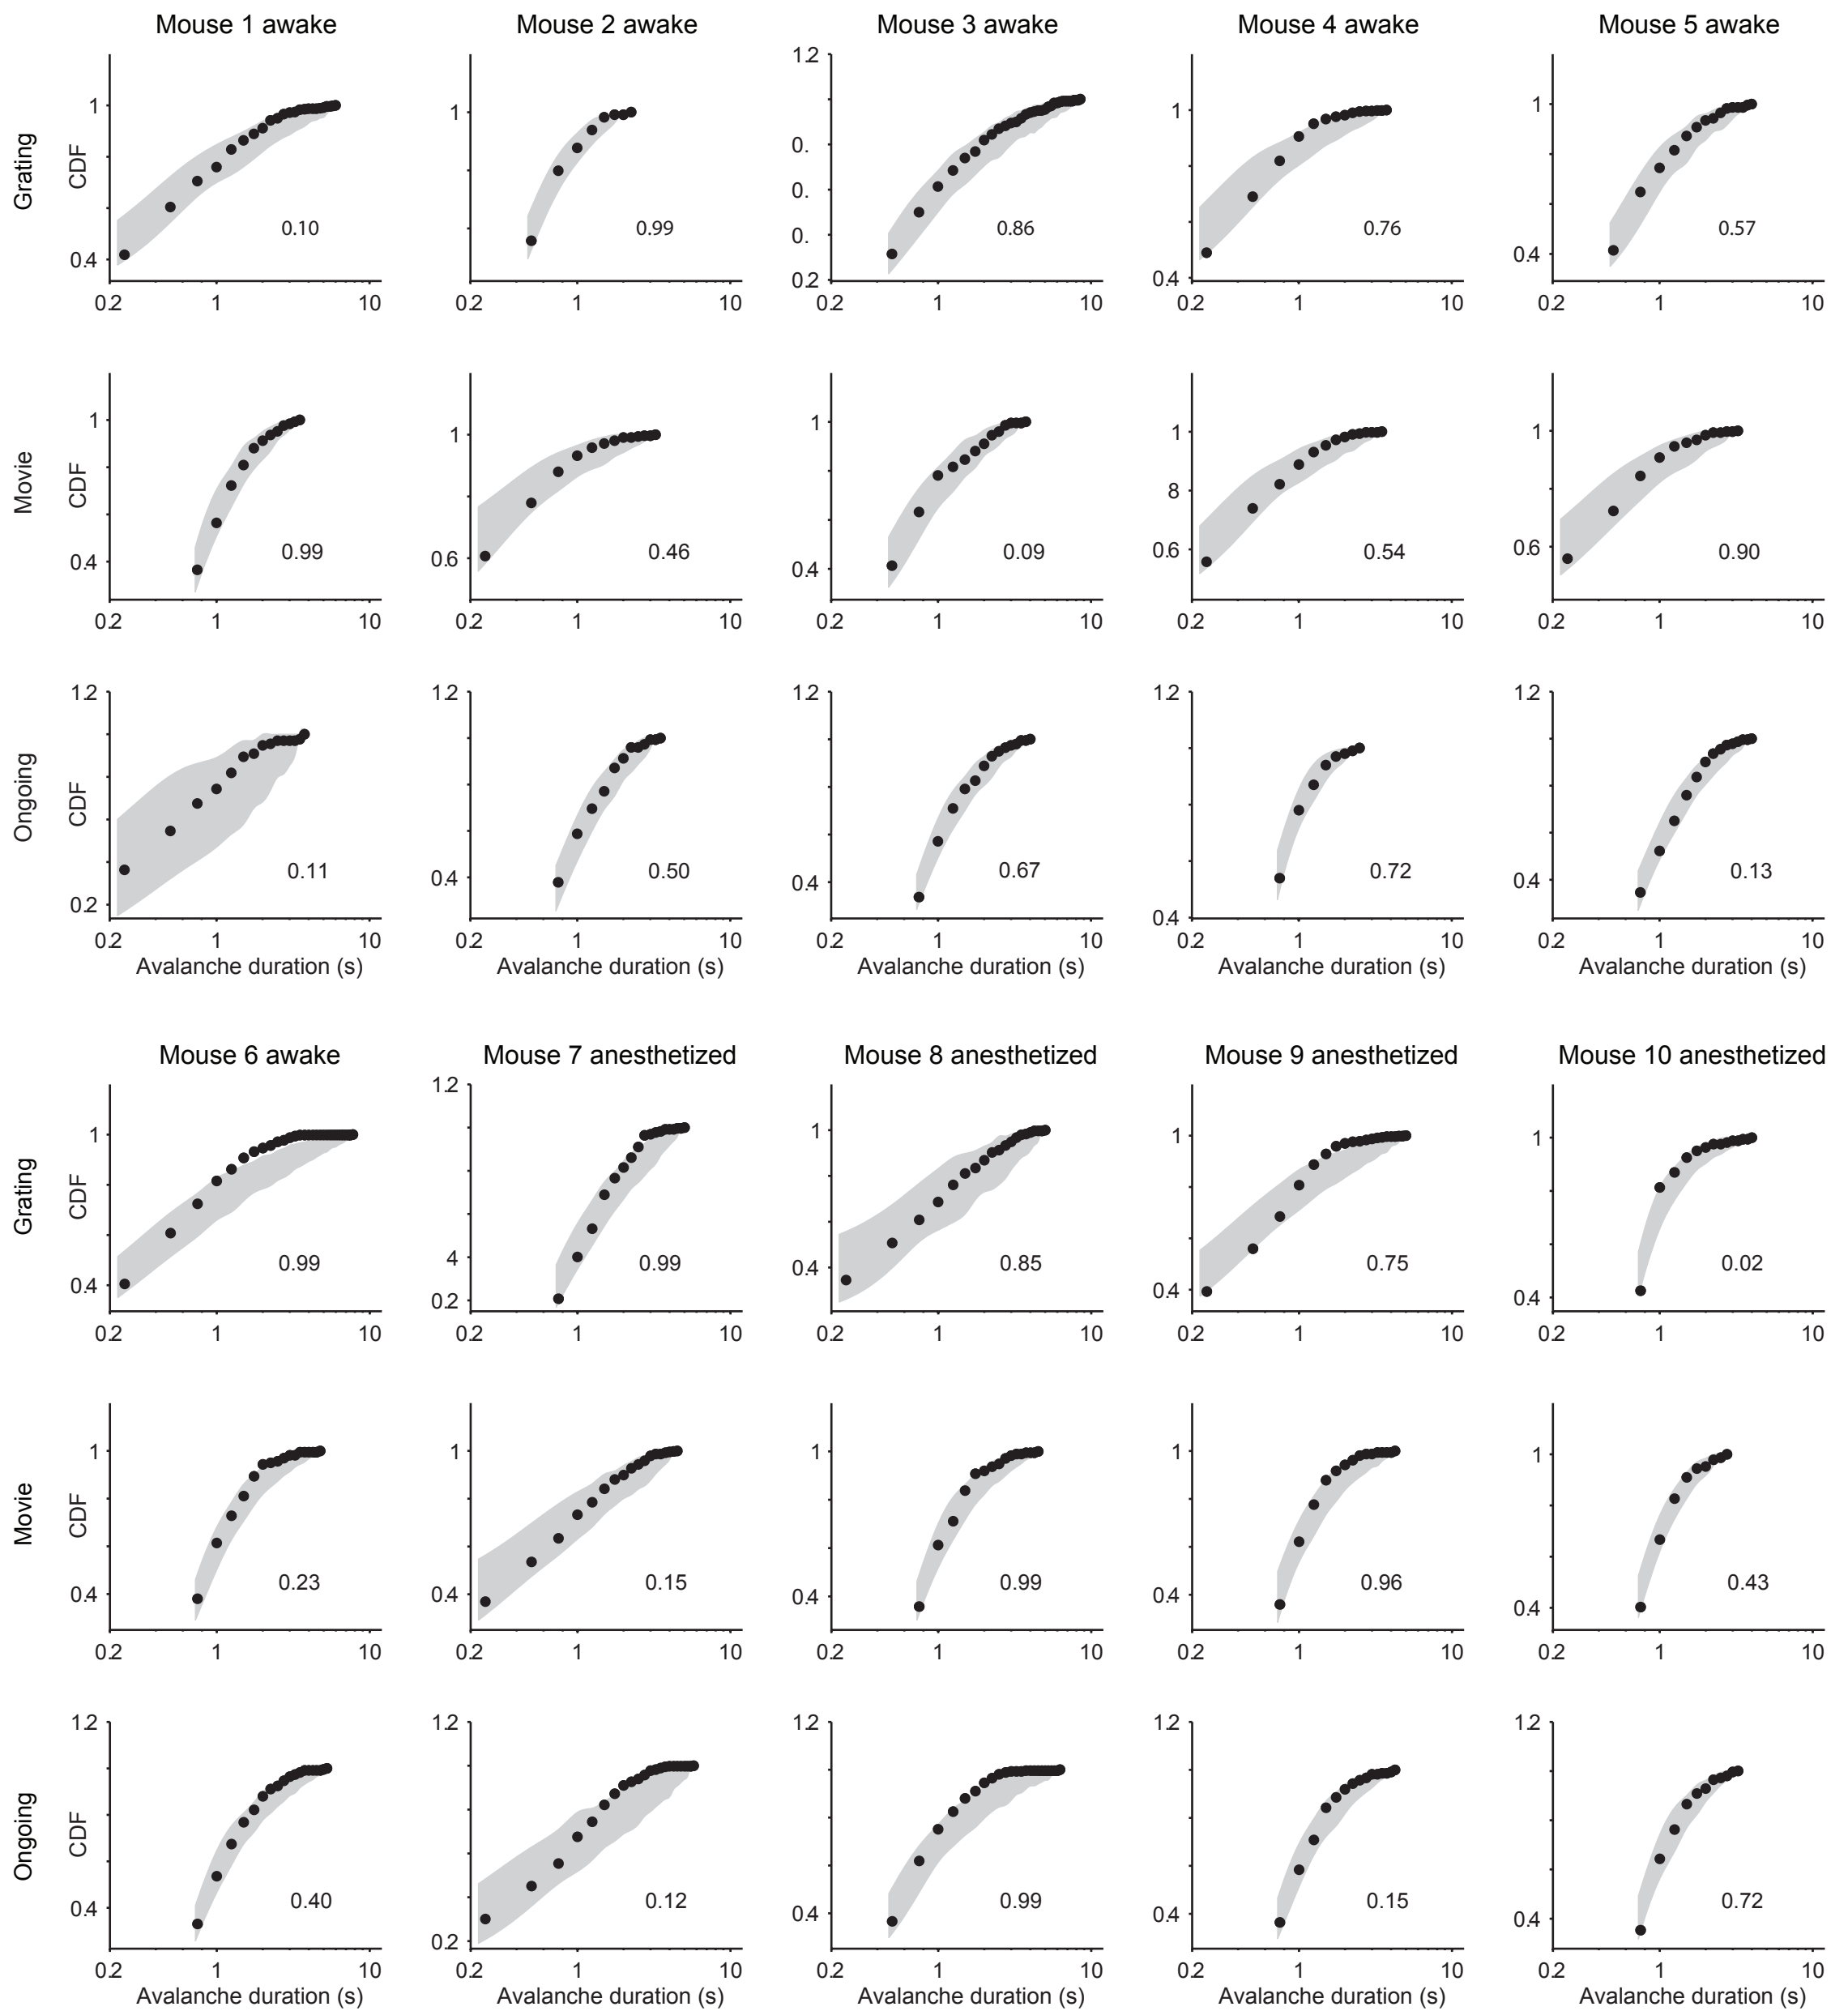

Supplement: pone.0177396.s006.pdf [file pone.0177396.s006.pdf]
